# Supplementary material for: The Bioavailability, Biodistribution, and Toxic Effects of Silica-Coated Upconversion Nanoparticles in vivo
Source: Front Chem. 2019 Apr 10;7:218. doi: 10.3389/fchem.2019.00218 (PMC6468325; doi:10.3389/fchem.2019.00218)
Supplement: Supplementary file 1 [file Table_1.docx]

Supplementary Material

The Bioavailability, Biodistribution and Toxic Effects of Silica-coated Upconversion Nanoparticles *in Vivo*

Mingzhu Zhou1,#, Xiaoqian Ge2,#, Da-Ming Ke1,#, Huan Tang3, Jun-Zheng Zhang1, Matteo Calvaresi4, Bin Gao5, Lining Sun2,*, Qianqian Su1,*, Haifang Wang1

1Institute of Nanochemistry and Nanobiology, Shanghai University, Shanghai 200444, China

2Research Center of Nano Science and Technology, and School of Material Science and Engineering, Shanghai University, Shanghai 200444, China

3Beijing National Laboratory for Molecular Sciences, College of Chemistry and Molecular Engineering, Peking University, Beijing 100871, ChinaBeijing National Laboratory for Molecular Sciences, College of Chemistry and Molecular Engineering, Peking University, Beijing 100871, China

4Dipartimento di Chimica “G. Ciamician”, Alma Mater Studiorum – Università di Bologna, via F. Selmi 2, 40126 Bologna, Italy

5Cancer and Stem Cell Biology Program, Duke-NUS Medical School, 8 College Road, Singapore, 169857, Singapore

***Correspondence:** Corresponding Authors: chmsqq@shu.edu.cn (Q. Su), lnsun@shu.edu.cn (L. Sun)

#These authors contributed equally.

**
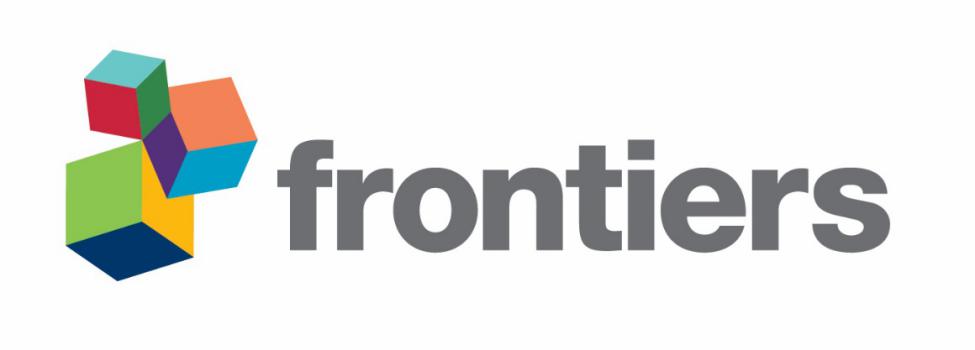
**

**Table S1.** Composition of simulated body fluid (amounts based on 1000 mL of juice) (Tang et al., 2016).

| Name | Reagent | Content |
| --- | --- | --- |
| SBF  (pH = 7.4) | NaCl | 8.035 g |
| NaHCO3 | 0.355 g |
| KCl | 0.225 g |
| K2HPO4·3H2O | 0.231 g |
| MgCl2·6H2O | 0.311 g |
| 1.0 M HCl | 39 mL |
| CaCl2 | 0.292 g |
| Na2SO4 | 0.072 g |
| Tris | 6.118 g |
| 1.0 M HCl | 0-5 mL |

Tang, H., Yang, S. T., Yang, Y. F., Ke, D. M., Liu, J. H., Chen, X., et al. (2016). Blood clearance, distribution, transformation, excretion, and toxicity of near-infrared quantum dots Ag2Se in mice. *ACS Appl. Mater. Interfaces* 8, 17859−17869. doi: 10.1021/acsami.6b05057.

**Table S2.** Biochemical parameters of serum in the mice after consecutive gavage administration of NaYF4:Yb,Er@SiO2. *Significant difference vs the corresponding control (P<0.05, n = 3).

| *Parameter* | 7 Day | | | 14 Day | | |
| --- | --- | --- | --- | --- | --- | --- |
| 0 mg/kg | 20 mg/kg | 100 mg/kg | 0 mg/kg | 20 mg/kg | 100 mg/kg |
| ALT  (IU/L) | 26.3±5.7 | 27.0±7.0 | 26. 7±4.2 | 31.3±4.2 | 33.0±7.2 | 32.0±6.2 |
| AST  (IU/L) | 108.3±22.2 | 80.3±17.9 | 113.3±29.7 | 111.0±8.7 | 91.3±18.0 | 103.3±18.1 |
| ALP  (IU/L) | 406.0±78.0 | 459.0±49.9 | 535.3±127.1 | 456.7±88.8 | 321.7±36.0 | 474.3±78.4 |
| BUN  (mmol/L) | 6.9±0.5 | 8.4±0.4* | 9.3±1.5* | 8.7±1.0 | 8.3±1.3 | 8.5±1.5 |
| Crea  (μmol/L) | 9.7±1.1 | 10.0±1.7 | 10.3±1.5 | 12.3±0.6 | 11.3±1.2 | 10.0±1.0* |

**
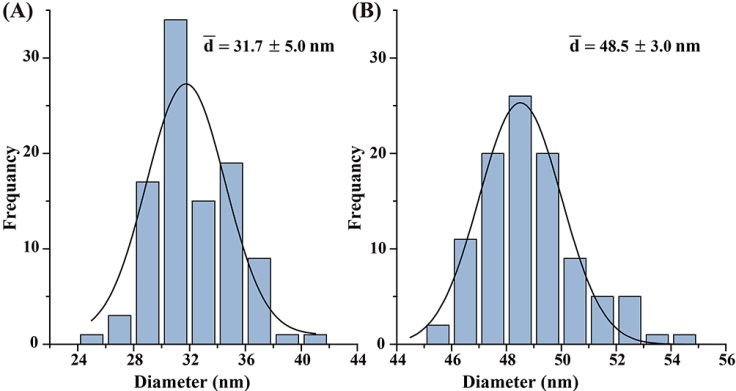
**

**Figure S1.** Size distribution of NaYF4:Yb,Er (A) and NaYF4:Yb,Er@SiO2 (B) nanoparticles measured by Image J software.


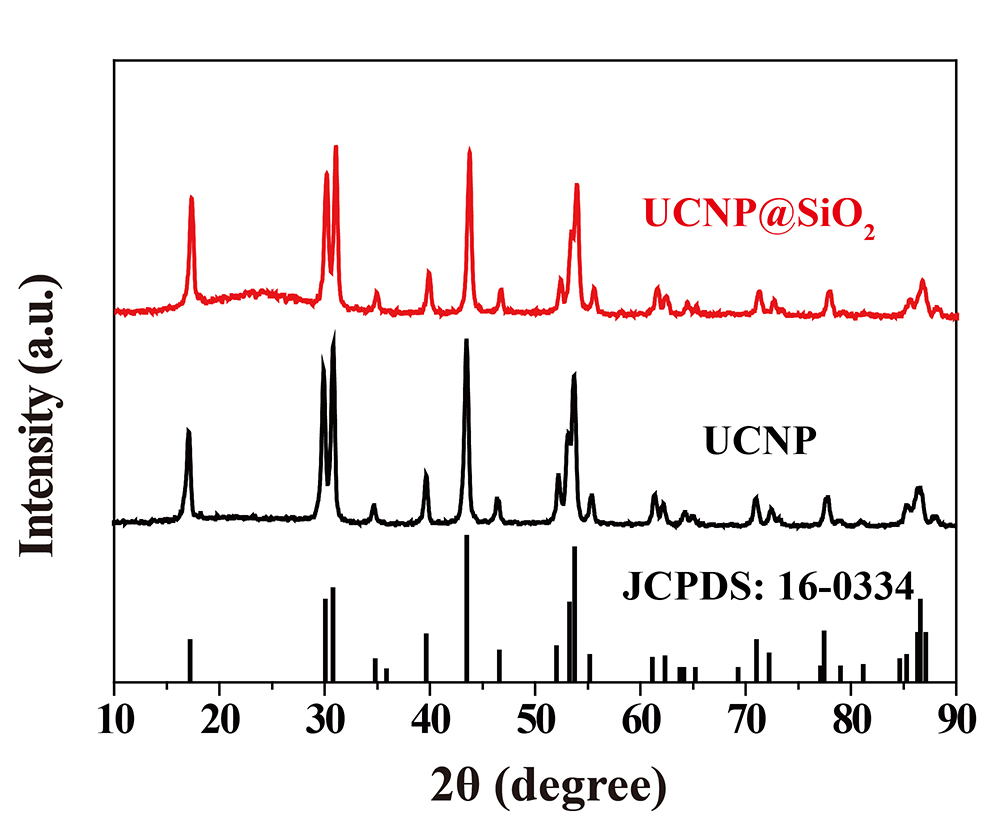


**Figure S2.** XRD patterns of NaYF4:Yb,Er, NaYF4:Yb,Er@SiO2, and the standard card of hexagonal NaYF4 (JCPDS: 16-0334). UCNP denotes NaYF4:Yb,Er. UCNP@SiO2 denotes NaYF4:Yb,Er@SiO2.


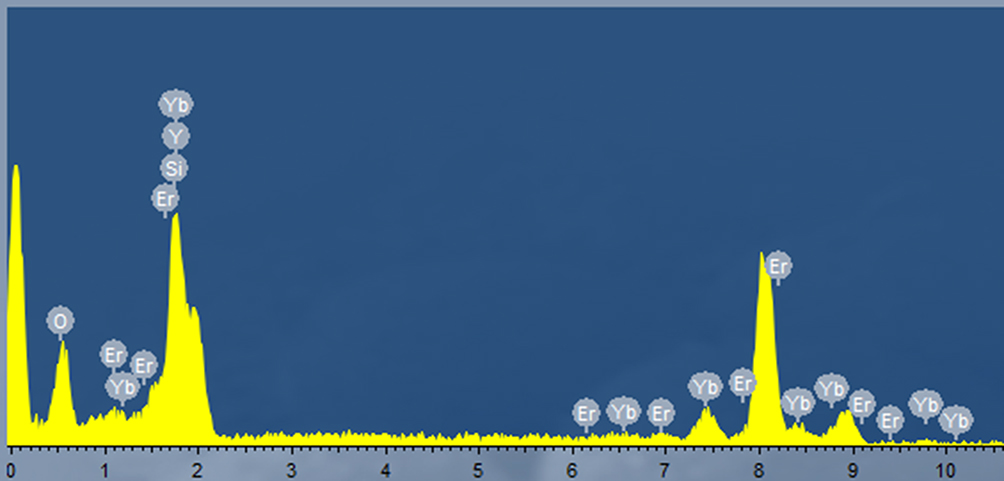


**Figure S3.** Energy dispersive X-ray (EDX) spectrum of NaYF4:Yb,Er@SiO2.


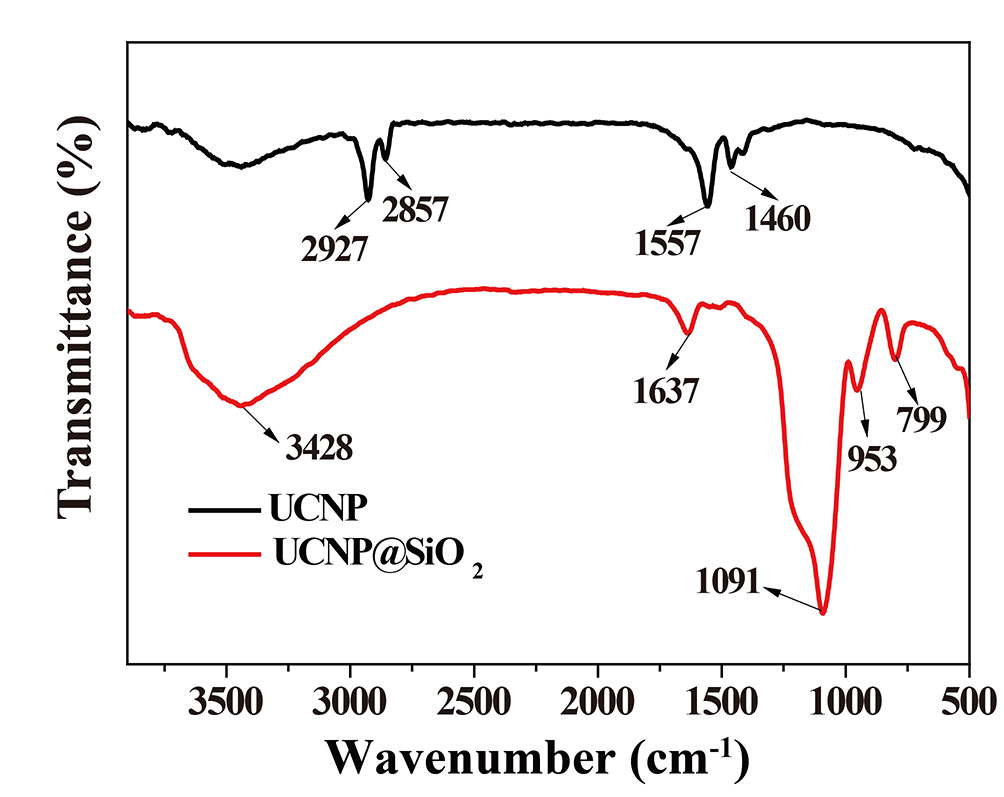


**Figure S4.** FT-IR spectra of the oleic acid coated NaYF4:Yb,Er and NaYF4:Yb,Er@SiO2. UCNP denotes oleic acid capped NaYF4:Yb,Er. UCNP@SiO2 denotes NaYF4:Yb,Er@SiO2.


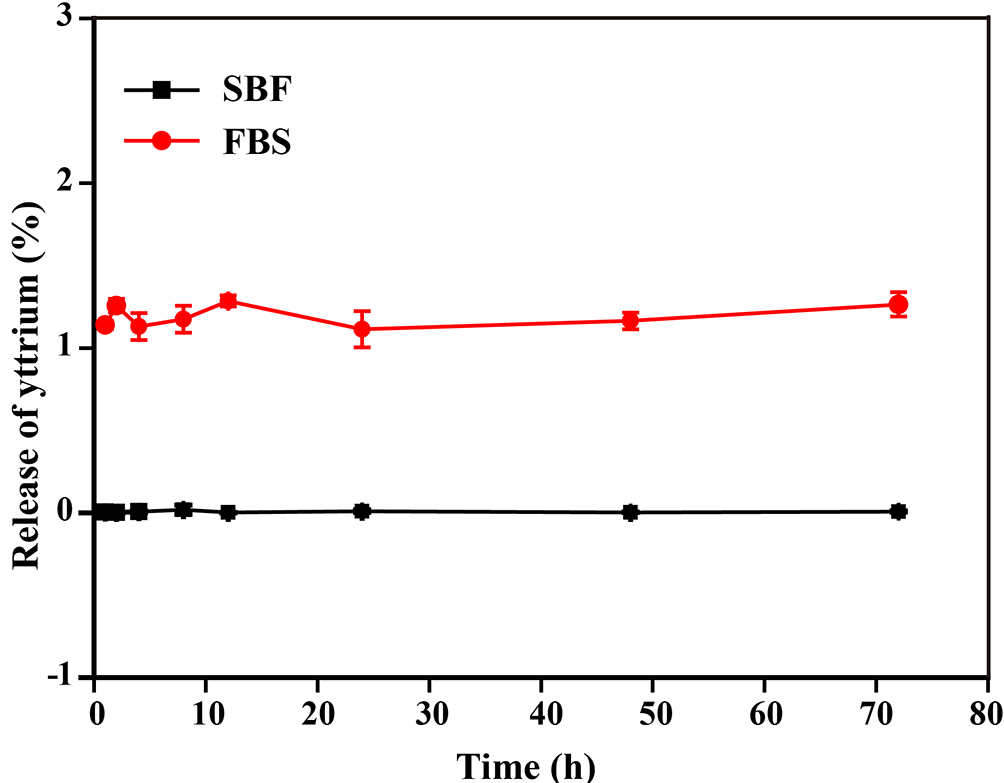


**Figure S5.** The release of yttrium from NaYF4:Yb,Er@SiO2 in SBF and FBS.

**
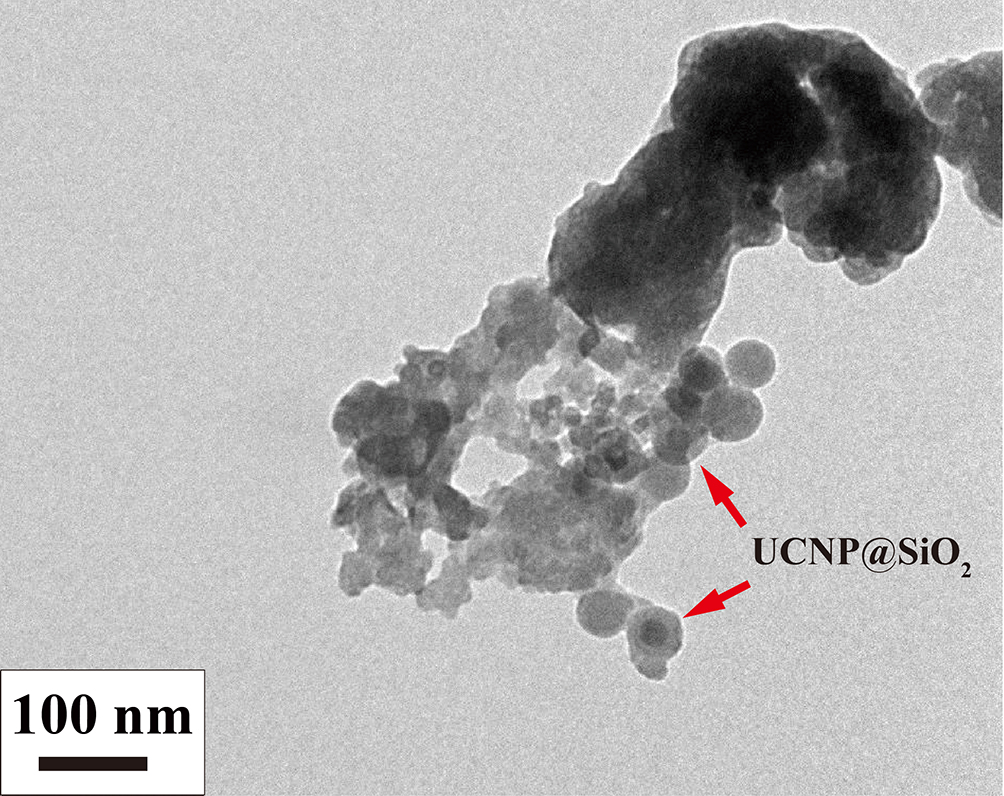
**

**Figure S6.** TEM image of NaYF4:Yb,Er@SiO2 in feces collected on the 14th day after mice were administrated consecutively with NaYF4:Yb,Er@SiO2 by gavage method. UCNP@SiO2 denotes NaYF4:Yb,Er@SiO2.

**
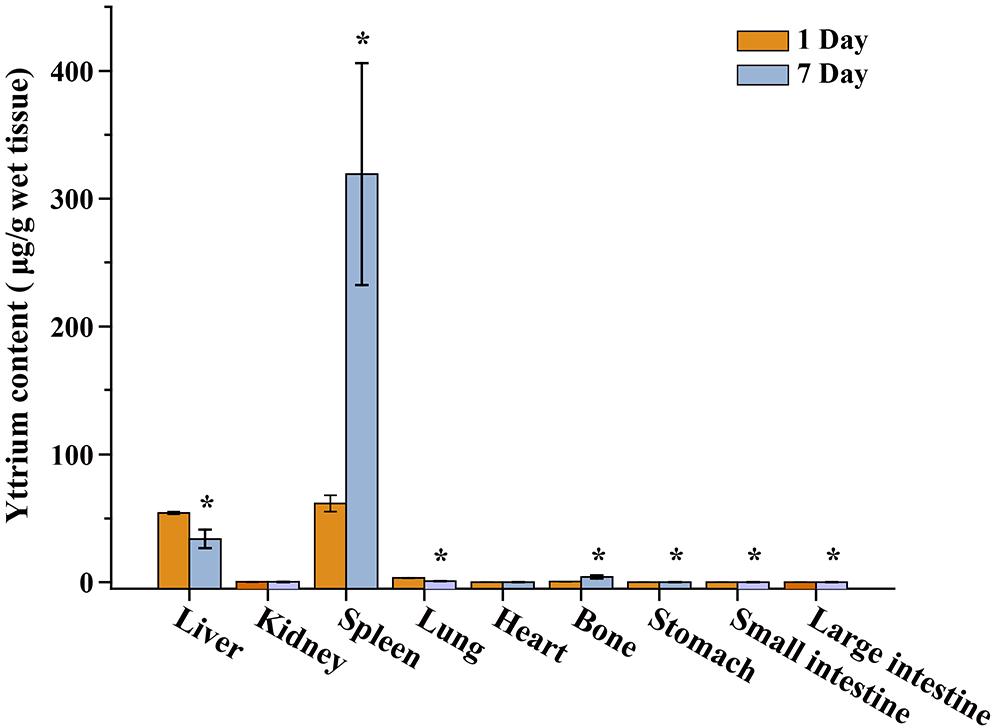
**

**Figure S7.** Yttrium content in the tissues of mice at day 1 and day 7 after a single intravenous administration of NaYF4:Yb,Er@SiO2, respectively. *Significant difference between the two treatment groups (P<0.05, n = 3).


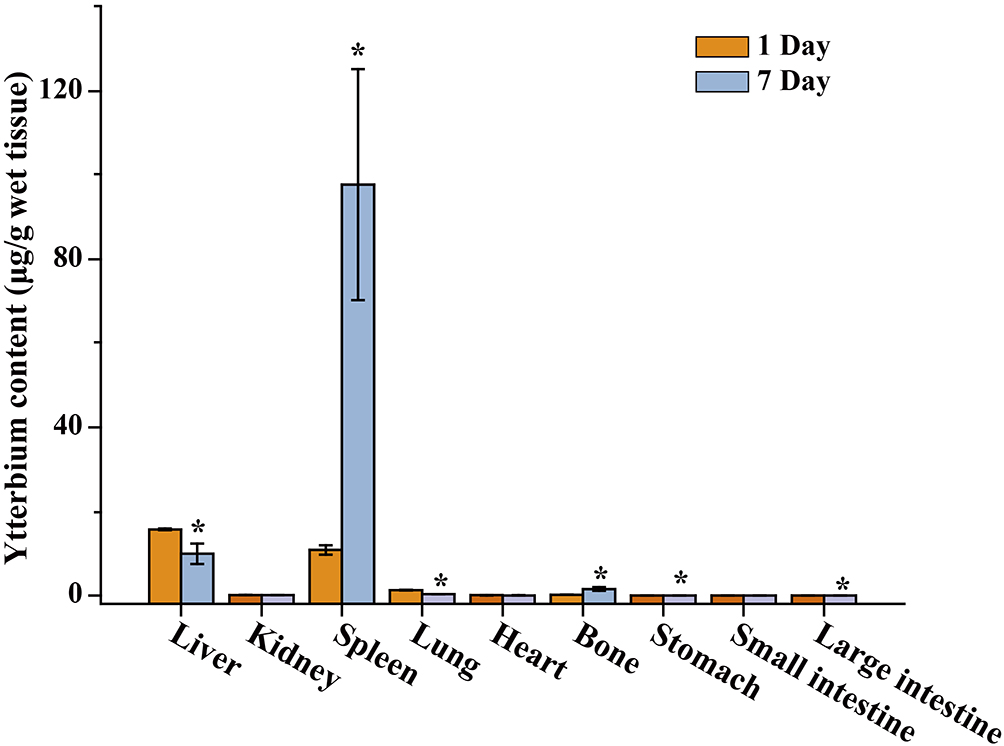


**Figure S8.** Ytterbium content in the tissues of mice at day 1 and day 7 after a single intravenous administration of NaYF4:Yb,Er@SiO2, respectively. *Significant difference between the two treatments groups (P<0.05, n = 3).

**
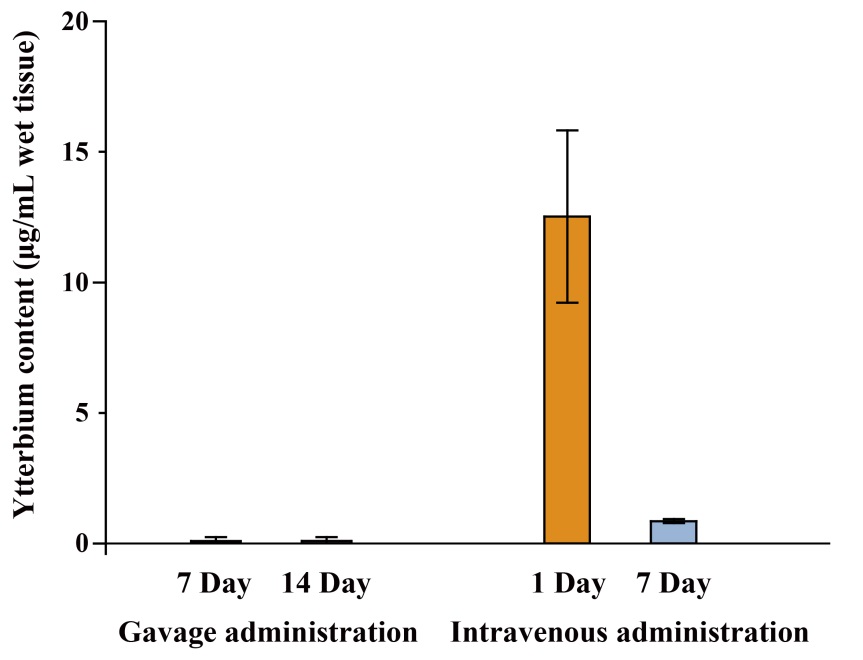
**

**Figure S9.** Ytterbium content in the blood of mice at day 7 and 14 at a dose of 20 mg/kg by gavage method and at day 1 and day 7 after a single intravenous administration of these nanoparticles with a dose of 20 mg/kg, respectively (n = 3).


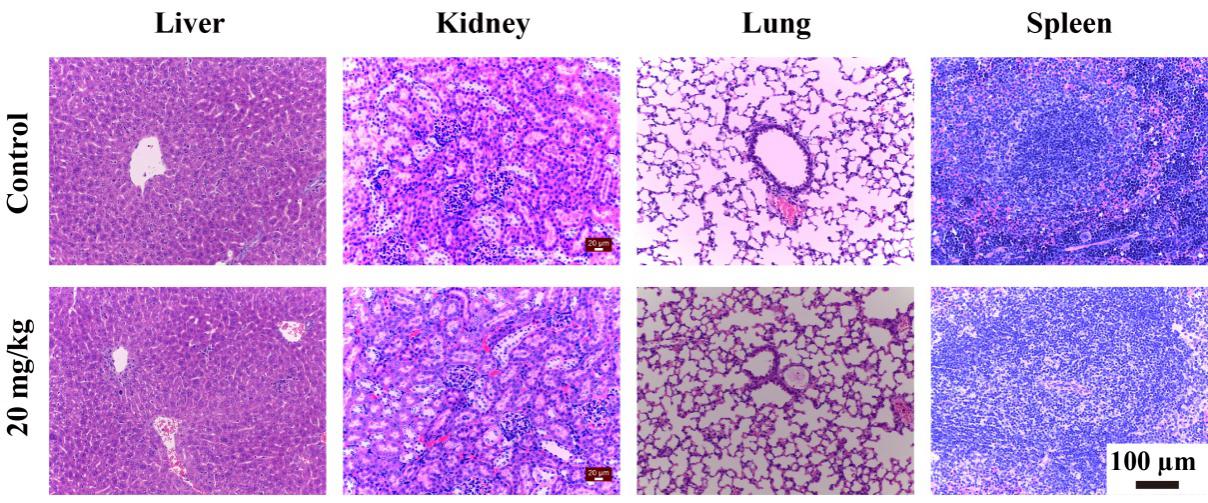


**Figure S10.** Histopathological observation of liver, kidney, lung and spleen of mice at day 1 after intravenous administration of NaYF4:Yb,Er@SiO2 into mice with a dose of 20 mg/kg.


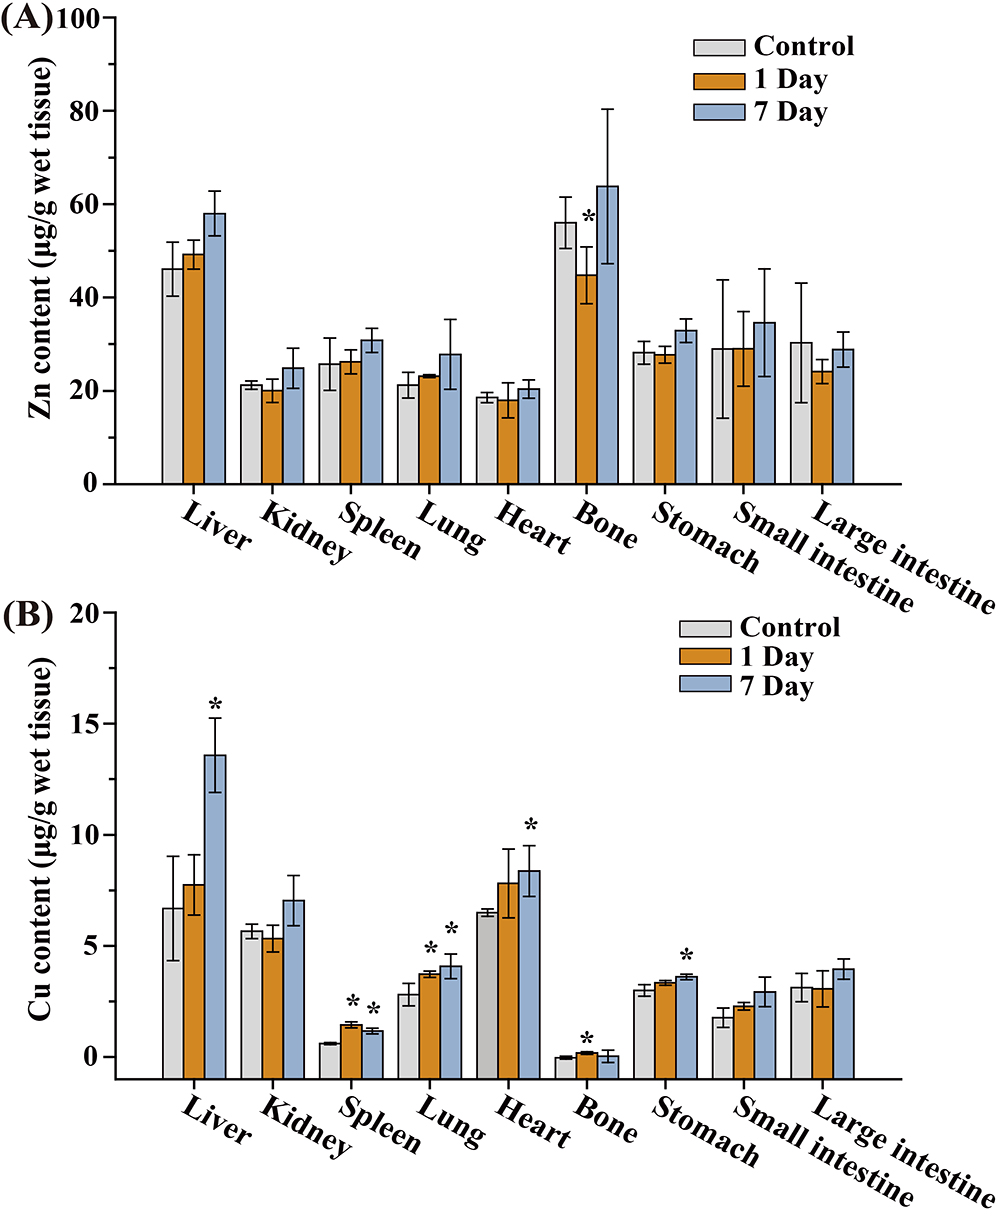


**Figure S11.** Zinc (A) and copper (B) content in the tissues of mice at day 1 and day 7 after a single intravenous administration of UCNP@SiO2. *Significant difference vs the corresponding control (P<0.05, n = 3).
